# Supplementary material for: Identification and prevalence of frailty in diabetes mellitus and association with clinical outcomes: a systematic review protocol
Source: PubMed Central journal article supplement (PMC7467518; doi:10.1136/bmjopen-2020-037476), 2020-09-01
Supplement: bmjopen-2020-037476supp002.pdf [file bmjopen-2020-037476supp002.pdf]

## The Newcastle-Ottawa Scale

Adaptation for studies assessing the prevalence and impact of frailty in diabetes

### 1 – Representativeness of the exposed (i.e. frail) cohort

- a) Truly representative (one star)
- b) Somewhat representative (one star)
- c) Selected group
- d) No description of the derivation of the cohort

### 2 – Selection of the non-exposed (i.e. non-frail) cohort

- a) Drawn from the same community as the exposed cohort (one star)
- b) Drawn from a different source
- c) No description of the derivation of the non-exposed cohort

### 3 – Ascertainment of exposure

- a) Validated measurement tool for frailty (two stars)
- b) Non-validated measurement tool, but the tool is available or described (one star)
- c) No description of measurement tool

### 4 – Non-respondents

- a) Comparability between respondents and non-respondents' characteristics is established, and the response rate is satisfactory (one star)
- b) The response rate is unsatisfactory, or the comparability between respondents and non-respondents is unsatisfactory
- c) No description of the response rate of the characteristics of the responders and non-responders

### 5 – Demonstration that outcome of interest was not present at the start of the study

- a) Yes (one star)
- b) No

### Comparability:

#### 1 – Comparability of the cohorts on the basis of the design or analysis being controlled for confounders

- a) The study controls for age and sex (one star)
- b) The study controls for other factors (one star)
- c) Cohorts are not comparable on the basis of the design or analysis controlled for confounders

Outcomes:

1 – Assessment of outcomes

a) Independent assessment (one star)

b) Record linkage (one star)

c) Self-report

d) No description

e) Other

2 – Follow-up long enough for outcomes to occur

a) Yes (one star)

b) No

3 – Adequacy of follow-up of cohorts

a) Complete follow-up: all subjects accounted for (one star)

b) Subjects lost to follow-up unlikely to introduce bias – number lost less than or equal to 20% or description of those lost suggested no different from those followed (one star)

c) Follow-up rate less than 80% and no description of those lost

d) No statement
